# Supplementary material
Source: publisher site journal article supplement (https://www.spandidos-publications.com/3510/downloadSupplementary)

Figure S1. Treatment with proteasome inhibitor PS341 leads to accumulation of cyclin B1 and MCL1 proteins following culture with CHX (1  $\mu$ g/ml). Control group was normalized to 1. Data are presented as fold change in protein expression relative to the control group. No protein detected was marked as '-'. Cells were treated with PS341 and paclitaxel for 16 h, and then CHX was added, followed by continued incubation for 8 h. Cells were harvested at 24 h. CHX, cycloheximide; MCL1, MCL1 apoptosis regulator, BCL2 family member; NC, negative control; PS341, bortezomib; PTX, paclitaxel.

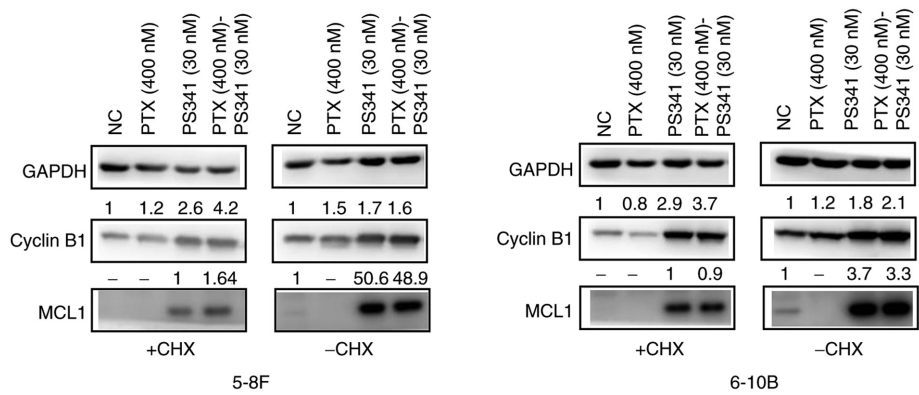

Figure S2. Ro3306 decreases paclitaxel-induced cell death in 5-8F and 6-10B cells. Annexin V-FITC and PI double-positive cells were considered to be late apoptotic cells, while Annexin V-FITC-positive and PI-negative cells were considered to be early apoptotic cells. NC, negative control; PTX, paclitaxel.

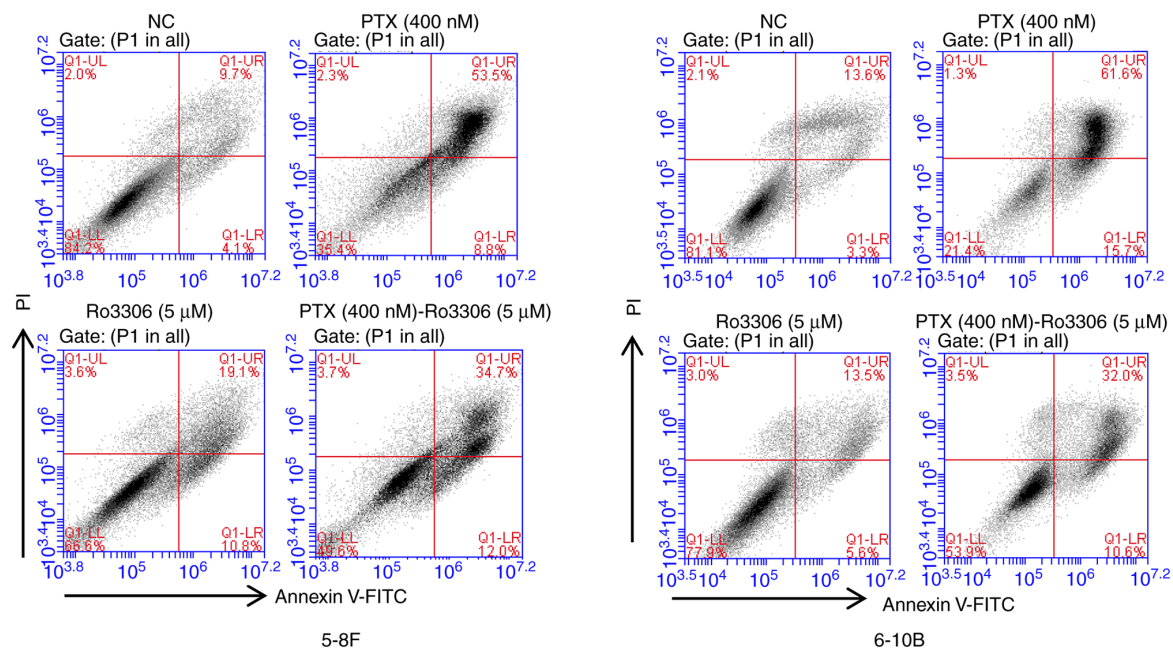

Supplement: Supplementary file 1 [file downloadSupplementary]
